# Supplementary material for: Effects of Traditional Processing Techniques on the Nutritional and Microbiological Quality of Four Edible Insect Species Used for Food and Feed in East Africa
Source: Foods. 2020 May 4;9(5):574. doi: 10.3390/foods9050574 (PMC7278588; doi:10.3390/foods9050574)
Supplement: Supplementary file 1 [file foods-09-00574-s001.pdf]

## Supplementary Materials

### S1: Traditional processing of edible insects in Africa

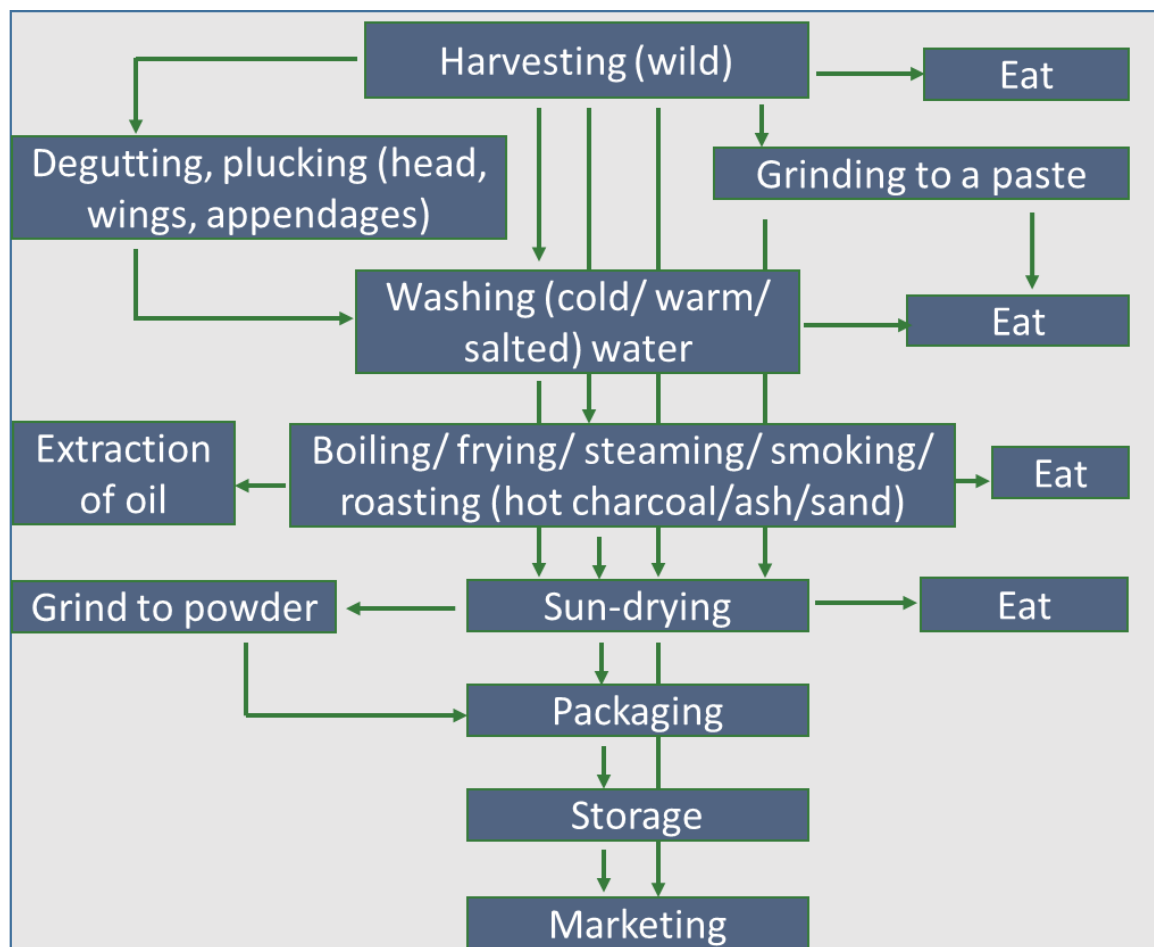

Figure S1.1: Traditional processing of edible insects in Africa (Extracted from: Mutungi, C.; Irungu, F.G.; Nduko, J.; Mutua, F.; Affognon, H.; Nakimbugwe, D.; Ekesi, S.; Fiaboe, K.K.M. Postharvest processes of edible insects in Africa: A review of processing methods, and the implications for nutrition, safety and new products development. *Critical Reviews in Food Science and Nutrition* **2019**, 59, 276-298, doi:10.1080/10408398.2017.1365330)

## S2: Analysis of variance (ANOVA) tables and graphical representations of the interaction effects of insect species and processing technique on proximate composition parameters

Table S2.1: Effect of processing method and species on moisture content

### Tests of Between-Subjects Effects

Dependent Variable: Moisture

| Source                         | Type III Sum of Squares | df | Mean Square | F          | Sig. |
|--------------------------------|-------------------------|----|-------------|------------|------|
| Corrected Model                | 50340.267 <sup>a</sup>  | 19 | 2649.488    | 2890.350   | .000 |
| Intercept                      | 98253.067               | 1  | 98253.067   | 107185.164 | .000 |
| Insect_spp                     | 90.400                  | 3  | 30.133      | 32.873     | .000 |
| Processing_method              | 49306.433               | 4  | 12326.608   | 13447.209  | .000 |
| Insect_spp * Processing_method | 943.433                 | 12 | 78.619      | 85.767     | .000 |
| Error                          | 36.667                  | 40 | .917        |            |      |
| Total                          | 148630.000              | 60 |             |            |      |
| Corrected Total                | 50376.933               | 59 |             |            |      |

a. R Squared = .999 (Adjusted R Squared = .999)

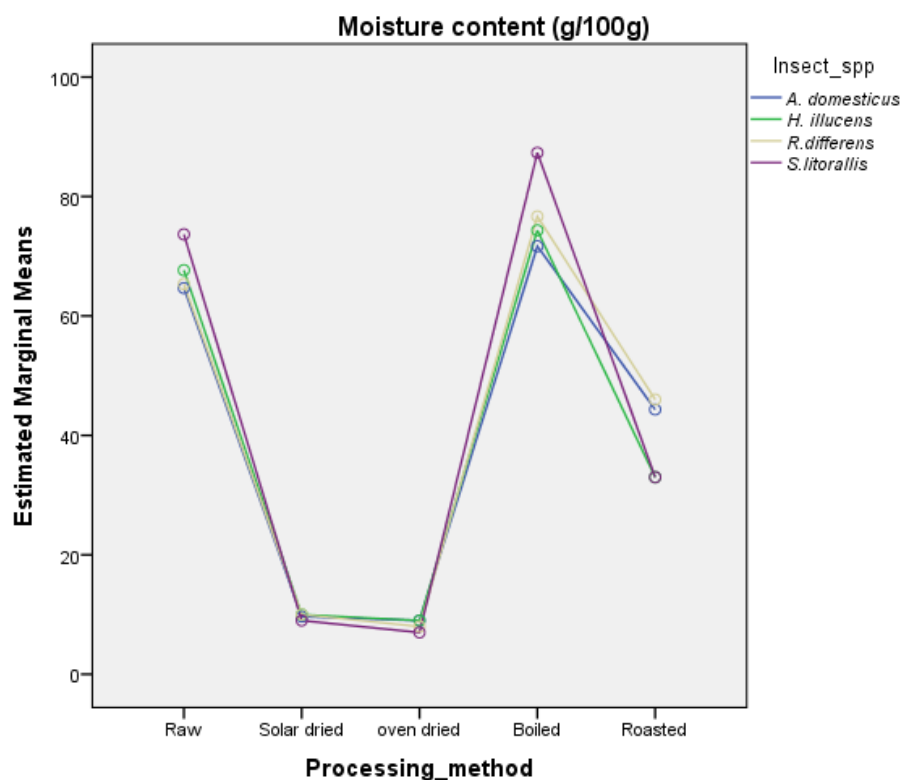

Figure S2.1: Interaction effect of insect species and processing technique on moisture content

Table S2.2: Effect of processing method and species on crude protein content

**Tests of Between-Subjects Effects**

Dependent Variable: %Protein\_dm

| Source                         | Type III Sum of Squares | df | Mean Square | F          | Sig. |
|--------------------------------|-------------------------|----|-------------|------------|------|
| Corrected Model                | 2919.267 <sup>a</sup>   | 19 | 153.646     | 288.086    | .000 |
| Intercept                      | 123125.400              | 1  | 123125.400  | 230860.125 | .000 |
| Insect_spp                     | 2459.800                | 3  | 819.933     | 1537.375   | .000 |
| Processing_method              | 399.100                 | 4  | 99.775      | 187.078    | .000 |
| Insect_spp * Processing_method | 60.367                  | 12 | 5.031       | 9.432      | .000 |
| Error                          | 21.333                  | 40 | .533        |            |      |
| Total                          | 126066.000              | 60 |             |            |      |
| Corrected Total                | 2940.600                | 59 |             |            |      |

a. R Squared = .993 (Adjusted R Squared = .989)

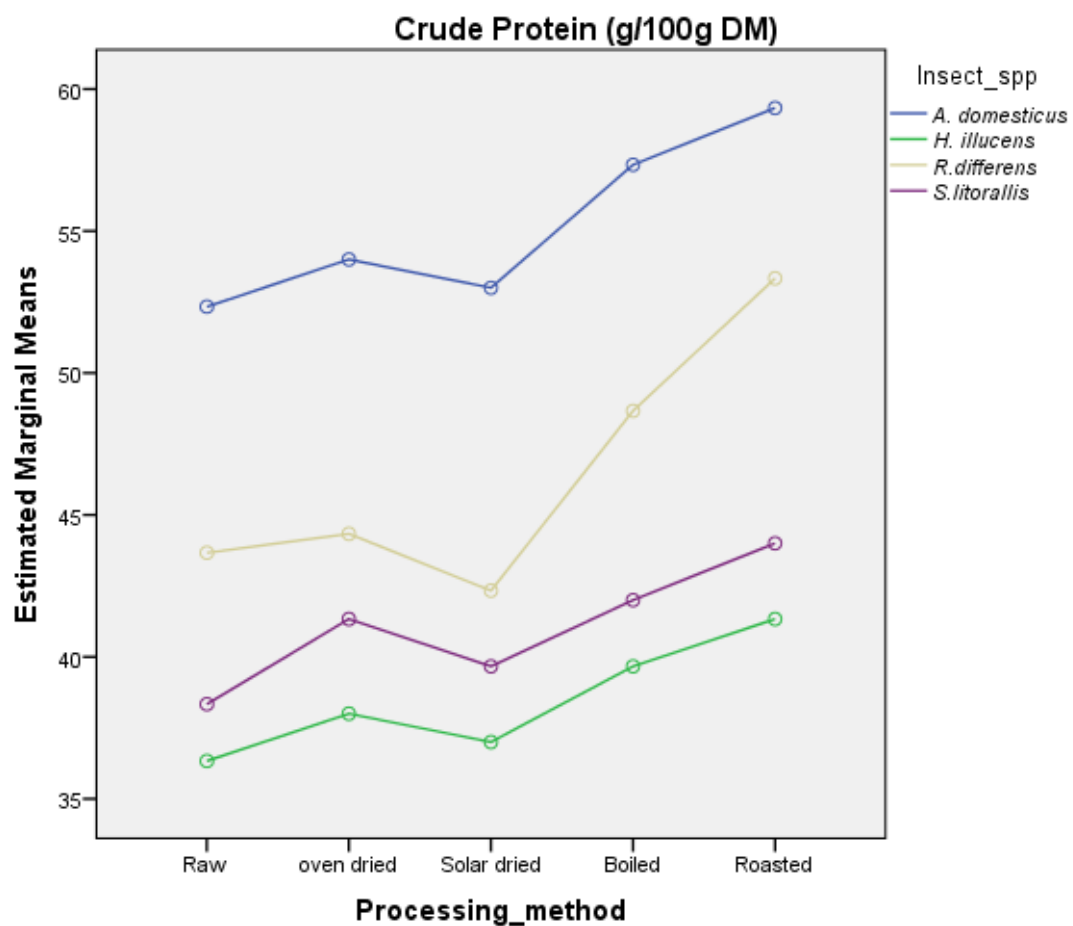

Figure S2.2: Interaction effect of insect species and processing technique on protein content

Table S2.3: Effect of processing method and species on crude fat content

**Tests of Between-Subjects Effects**

Dependent Variable: %Fat\_dm

| Source                         | Type III Sum of Squares | df | Mean Square | F          | Sig. |
|--------------------------------|-------------------------|----|-------------|------------|------|
| Corrected Model                | 2100.400 <sup>a</sup>   | 19 | 110.547     | 473.774    | .000 |
| Intercept                      | 24644.267               | 1  | 24644.267   | 105618.286 | .000 |
| Insect_spp                     | 1218.400                | 3  | 406.133     | 1740.571   | .000 |
| Processing_method              | 760.567                 | 4  | 190.142     | 814.893    | .000 |
| Insect_spp * Processing_method | 121.433                 | 12 | 10.119      | 43.369     | .000 |
| Error                          | 9.333                   | 40 | .233        |            |      |
| Total                          | 26754.000               | 60 |             |            |      |
| Corrected Total                | 2109.733                | 59 |             |            |      |

a. R Squared = .996 (Adjusted R Squared = .993)

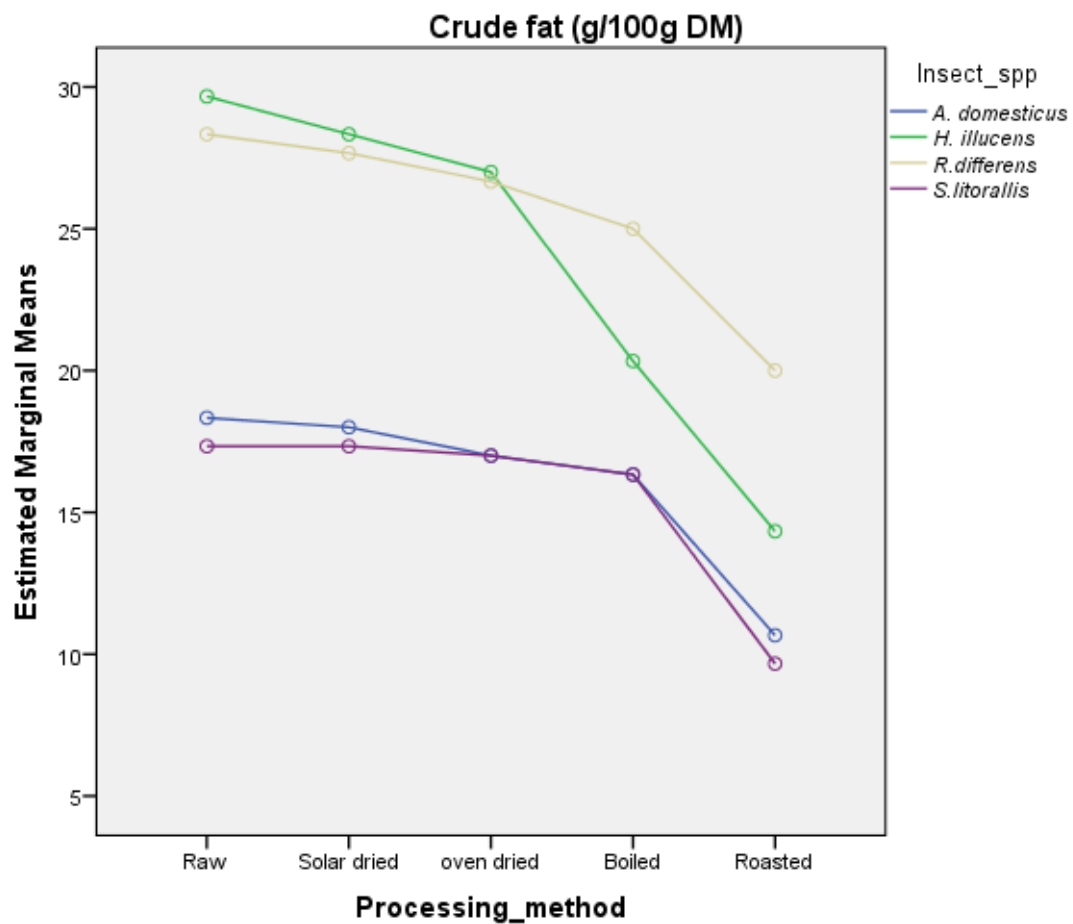

Figure S2.3: Interaction effect of insect species and processing technique on crude fat content

Table S2.4: Effect of processing method and species on crude fibre content

# Tests of Between-Subjects Effects

Dependent Variable: %Fiber\_dm

| Source            | Type III Sum of Squares | df | Mean Square | F         | Sig. |
|-------------------|-------------------------|----|-------------|-----------|------|
| Corrected Model   | 206.850 <sup>a</sup>    | 19 | 10.887      | 81.651    | .000 |
| Intercept         | 2842.817                | 1  | 2842.817    | 21321.125 | .000 |
| Insect_spp        | 189.650                 | 3  | 63.217      | 474.125   | .000 |
| Processing_method | 5.433                   | 4  | 1.358       | 10.188    | .000 |
| Insect_spp *      | 11.767                  | 12 | .981        | 7.354     | .000 |
| Error             | 5.333                   | 40 | .133        |           |      |
| Total             | 3055.000                | 60 |             |           |      |
| Corrected Total   | 212.183                 | 59 |             |           |      |

a. R Squared = .975 (Adjusted R Squared = .963)

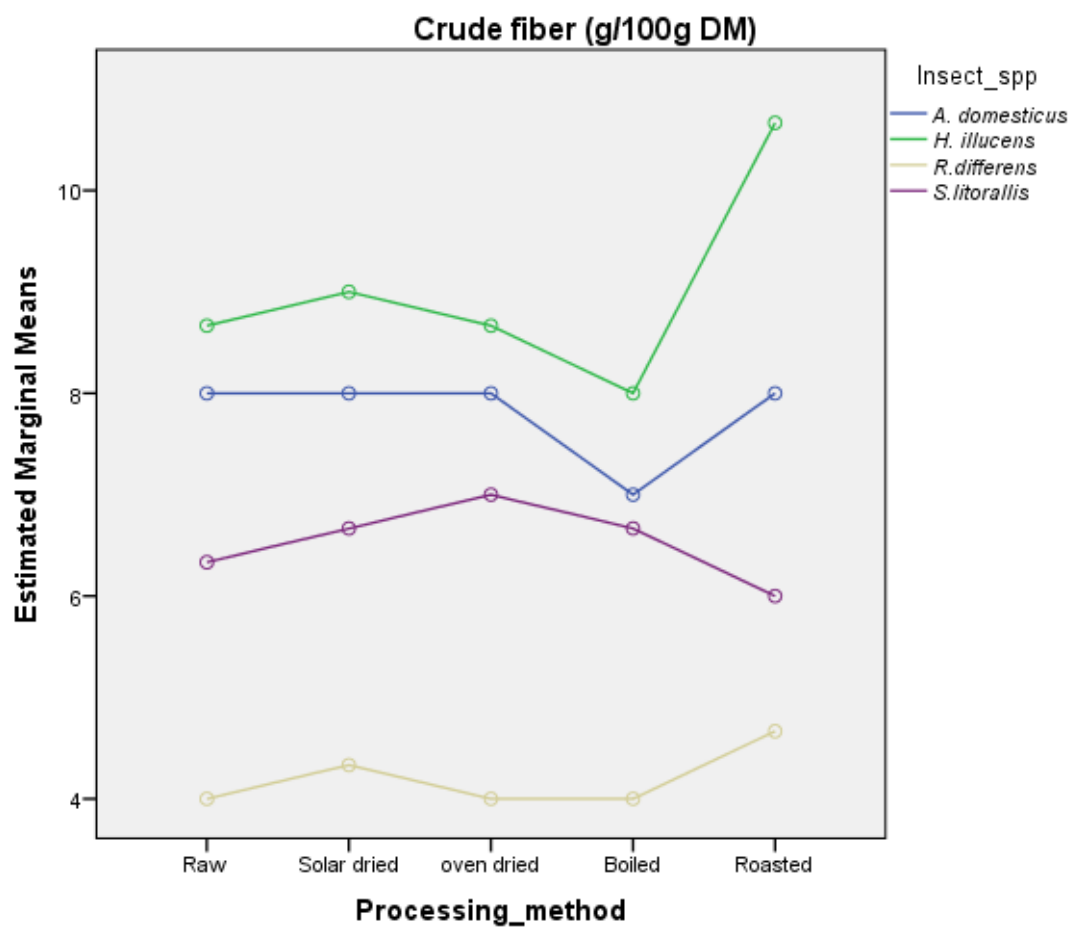

Figure S2.4: Interaction effect of insect species and processing technique on crude fibre content

Table S2.5: Effect of processing method and species on crude ash content

**Tests of Between-Subjects Effects**

Dependent Variable: %Ash\_dm

| Source                         | Type III Sum of Squares | df | Mean Square | F        | Sig. |
|--------------------------------|-------------------------|----|-------------|----------|------|
| Corrected Model                | 233.600 <sup>a</sup>    | 19 | 12.295      | 81.965   | .000 |
| Intercept                      | 1382.400                | 1  | 1382.400    | 9216.000 | .000 |
| Insect_spp                     | 205.333                 | 3  | 68.444      | 456.296  | .000 |
| Processing_method              | 20.433                  | 4  | 5.108       | 34.056   | .000 |
| Insect_spp * Processing_method | 7.833                   | 12 | .653        | 4.352    | .000 |
| Error                          | 6.000                   | 40 | .150        |          |      |
| Total                          | 1622.000                | 60 |             |          |      |
| Corrected Total                | 239.600                 | 59 |             |          |      |

a. R Squared = .975 (Adjusted R Squared = .963)

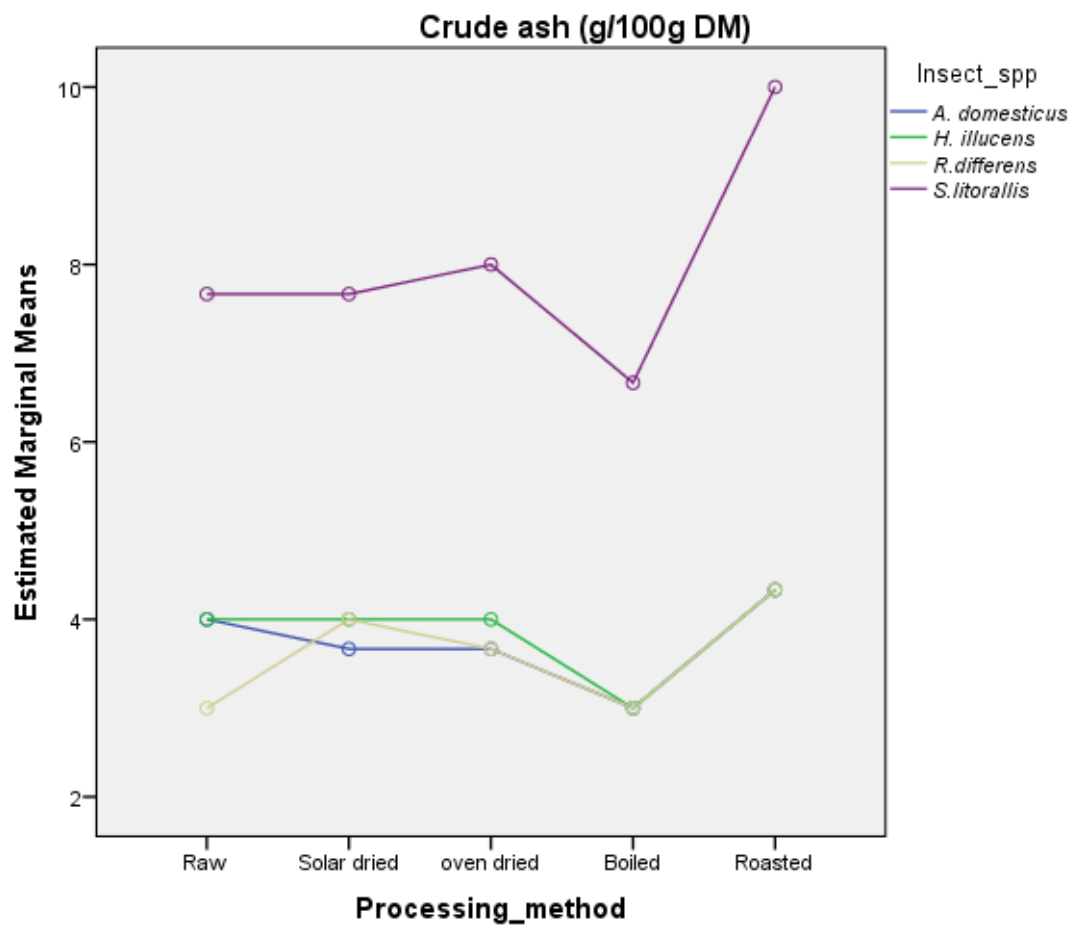

Figure S2.5: Interaction effect of insect species and processing technique on crude ash content

Table S2.6: Effect of processing method and species on available carbohydrate content

# Tests of Between-Subjects Effects

Dependent Variable: %CHO\_dm

| Source                         | Type III Sum of Squares | df | Mean Square | F         | Sig. |
|--------------------------------|-------------------------|----|-------------|-----------|------|
| Corrected Model                | 1514.933 <sup>a</sup>   | 19 | 79.733      | 93.804    | .000 |
| Intercept                      | 31373.067               | 1  | 31373.067   | 36909.490 | .000 |
| Insect_spp                     | 1271.733                | 3  | 423.911     | 498.719   | .000 |
| Processing_method              | 20.933                  | 4  | 5.233       | 6.157     | .001 |
| Insect_spp * Processing_method | 222.267                 | 12 | 18.522      | 21.791    | .000 |
| Error                          | 34.000                  | 40 | .850        |           |      |
| Total                          | 32922.000               | 60 |             |           |      |
| Corrected Total                | 1548.933                | 59 |             |           |      |

a. R Squared = .978 (Adjusted R Squared = .968)

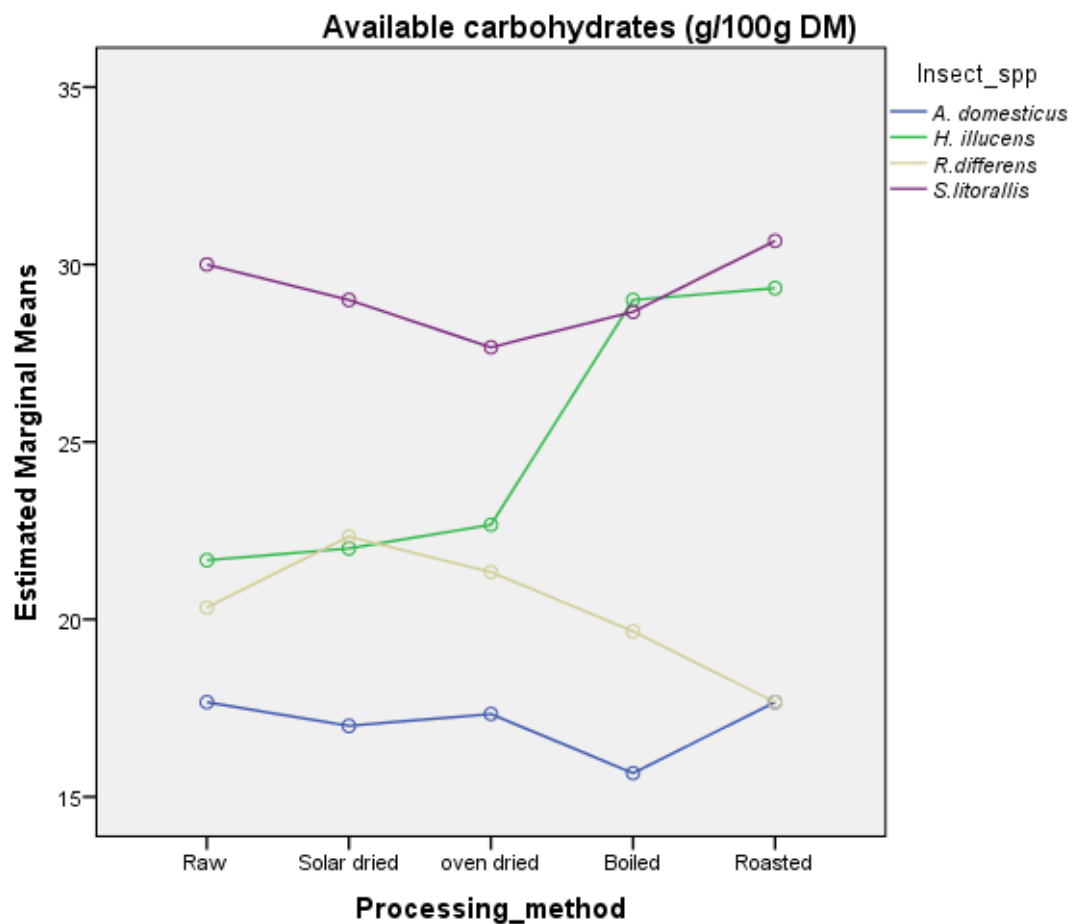

Figure S2.6: Interaction effect of insect species and processing technique on carbohydrate content

### S3. Anova tables and graphical representation of the interaction effects of insect species and processing technique on microbiological quality parameters

Table S3.1: Effect of processing method and species on TVC (Log CFU/g)

#### Tests of Between-Subjects Effects

Dependent Variable: TVC

| Source                         | Type III Sum of Squares | df  | Mean Square | F         | Sig. |
|--------------------------------|-------------------------|-----|-------------|-----------|------|
| Corrected Model                | 682.769 <sup>a</sup>    | 35  | 19.508      | 421.366   | .000 |
| Intercept                      | 1984.898                | 1   | 1984.898    | 42873.800 | .000 |
| Insect_spp                     | 5.657                   | 3   | 1.886       | 40.733    | .000 |
| Processing_method              | 656.352                 | 8   | 82.044      | 1772.150  | .000 |
| Insect_spp * Processing_method | 20.759                  | 24  | .865        | 18.683    | .000 |
| Error                          | 3.333                   | 72  | .046        |           |      |
| Total                          | 2671.000                | 108 |             |           |      |
| Corrected Total                | 686.102                 | 107 |             |           |      |

a. R Squared = .995 (Adjusted R Squared = .993)

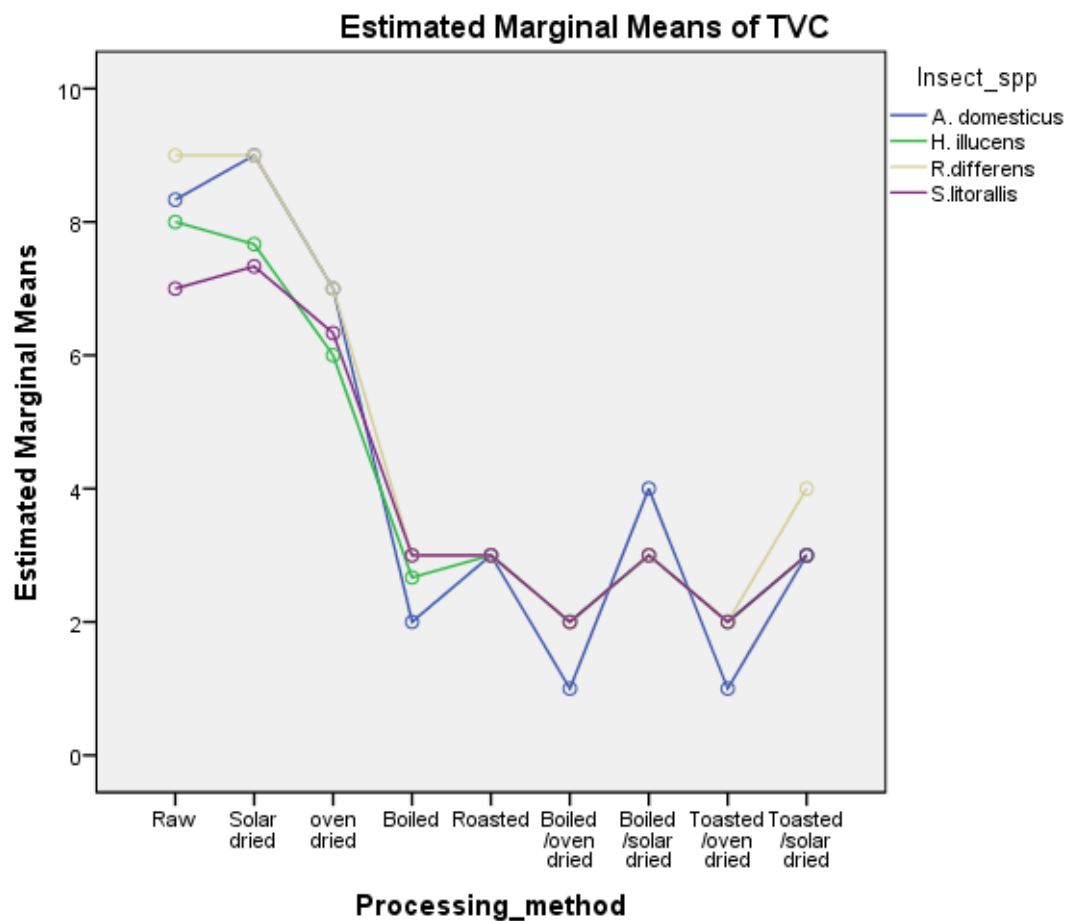

Figure S3.1: Interaction effect of insect species and processing technique on TVC

Table S3.2: Effect of processing method and species on Enterobacteriaceae (Log CFU/g)

**Tests of Between-Subjects Effects**

Dependent Variable: Enterobacteria

| Source                         | Type III Sum of Squares | df  | Mean Square | F         | Sig. |
|--------------------------------|-------------------------|-----|-------------|-----------|------|
| Corrected Model                | 773.583 <sup>a</sup>    | 35  | 22.102      | 1193.529  | .000 |
| Intercept                      | 200.083                 | 1   | 200.083     | 10804.500 | .000 |
| Insect_spp                     | 2.102                   | 3   | .701        | 37.833    | .000 |
| Processing_method              | 754.667                 | 8   | 94.333      | 5094.000  | .000 |
| Insect_spp * Processing_method | 16.815                  | 24  | .701        | 37.833    | .000 |
| Error                          | 1.333                   | 72  | .019        |           |      |
| Total                          | 975.000                 | 108 |             |           |      |
| Corrected Total                | 774.917                 | 107 |             |           |      |

a. R Squared = .998 (Adjusted R Squared = .997)

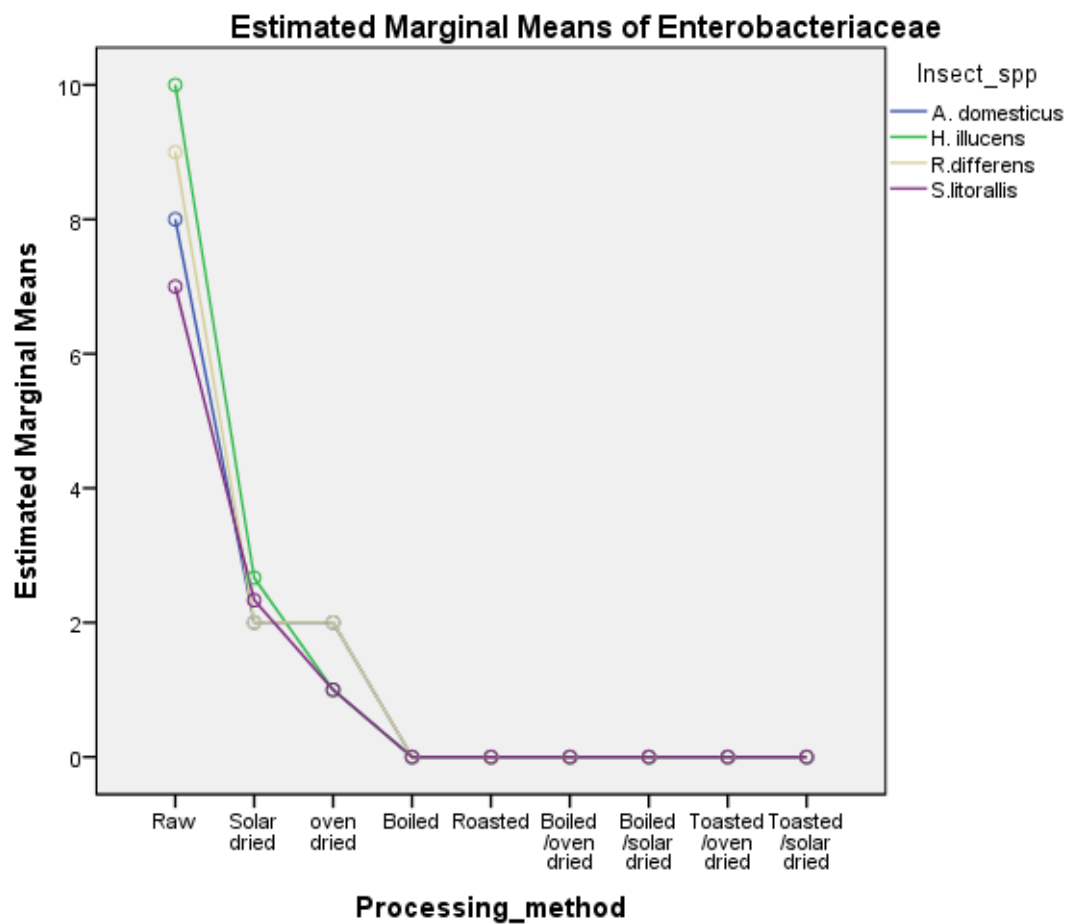

Figure S3.2: Interaction effect of insect species and processing technique on Enterobacteriaceae

Table S3.3: Effect of processing method and species on YMC (Log CFU/g)

**Tests of Between-Subjects Effects**

Dependent Variable: Yeast\_molds

| Source                         | Type III Sum of Squares | df  | Mean Square | F         | Sig. |
|--------------------------------|-------------------------|-----|-------------|-----------|------|
| Corrected Model                | 1014.519 <sup>a</sup>   | 35  | 28.986      | 1565.257  | .000 |
| Intercept                      | 448.148                 | 1   | 448.148     | 24200.000 | .000 |
| Insect_spp                     | 7.481                   | 3   | 2.494       | 134.667   | .000 |
| Processing_method              | 985.019                 | 8   | 123.127     | 6648.875  | .000 |
| Insect_spp * Processing_method | 22.019                  | 24  | .917        | 49.542    | .000 |
| Error                          | 1.333                   | 72  | .019        |           |      |
| Total                          | 1464.000                | 108 |             |           |      |
| Corrected Total                | 1015.852                | 107 |             |           |      |

a. R Squared = .999 (Adjusted R Squared = .998)

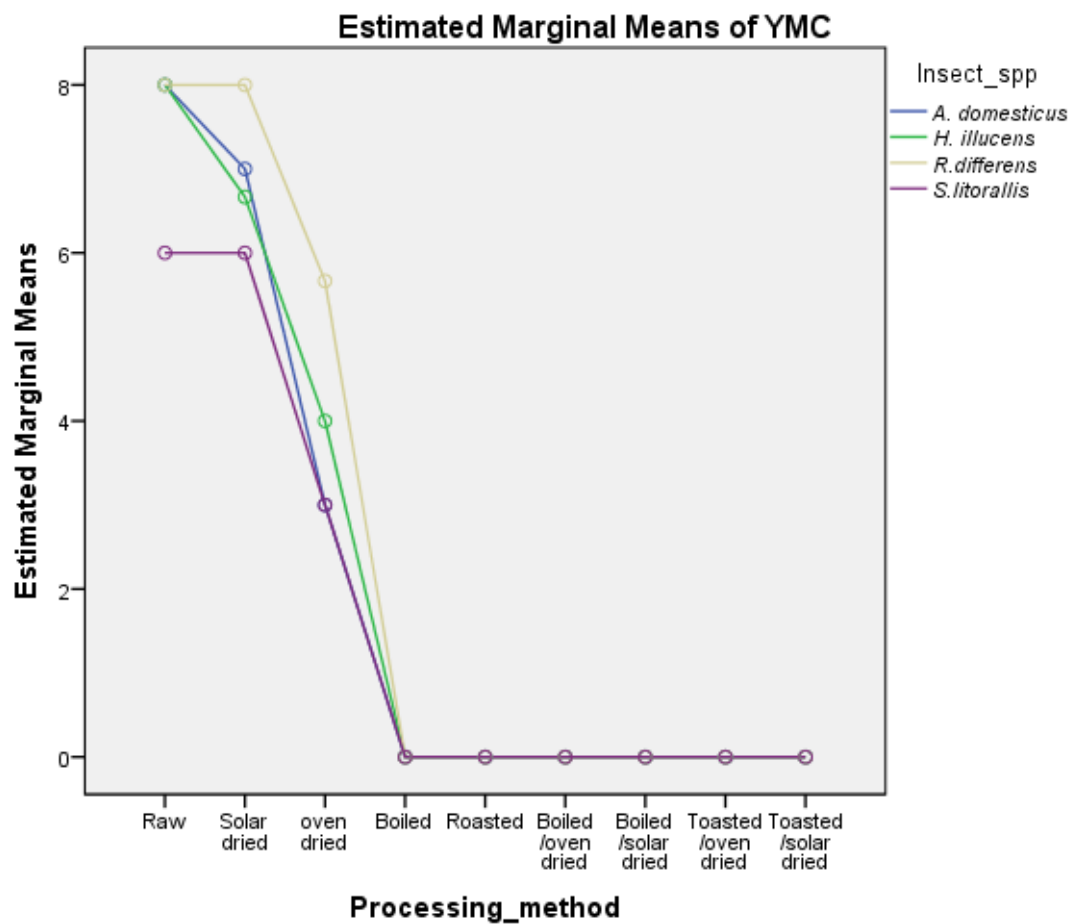

Figure S3.3: Interaction effect of insect species and processing technique on YMC

Table S3.4: Effect of processing method and species on coliform count (Log CFU/g)

# Tests of Between-Subjects Effects

Dependent Variable: coliform count

| Source            | Type III Sum of Squares | df  | Mean Square | F         | Sig. |
|-------------------|-------------------------|-----|-------------|-----------|------|
| Corrected Model   | 876.333 <sup>a</sup>    | 35  | 25.038      | 1352.057  | .000 |
| Intercept         | 320.333                 | 1   | 320.333     | 17298.000 | .000 |
| Insect_spp        | 9.296                   | 3   | 3.099       | 167.333   | .000 |
| Processing_method | 836.833                 | 8   | 104.604     | 5648.625  | .000 |
| Insect_spp *      | 30.204                  | 24  | 1.258       | 67.958    | .000 |
| Error             | 1.333                   | 72  | .019        |           |      |
| Total             | 1198.000                | 108 |             |           |      |
| Corrected Total   | 877.667                 | 107 |             |           |      |

a. R Squared = .998 (Adjusted R Squared = .998)

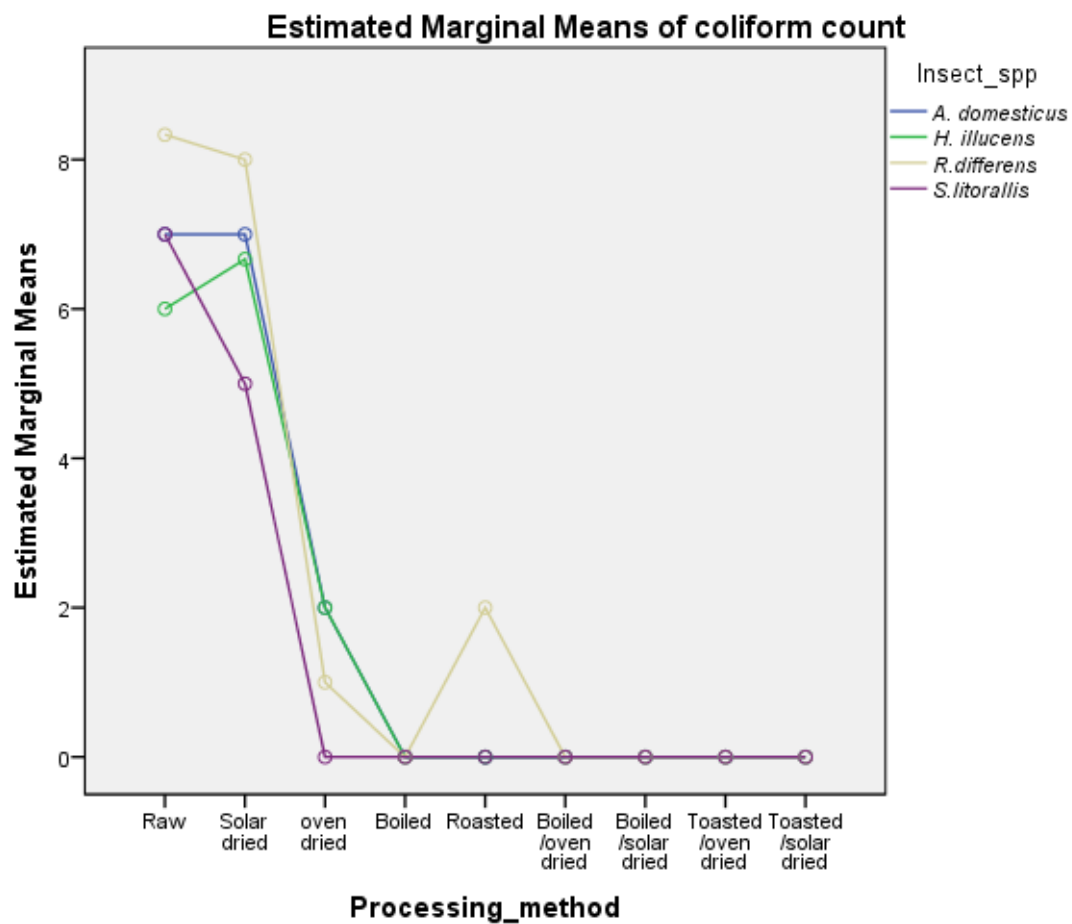

Figure S3.4: Interaction effect of insect species and processing technique on coliform count

Table S3.5: Effect of processing method and species on lactose positive enteric bacteria (Log CFU/g)

**Tests of Between-Subjects Effects**

Dependent Variable: Lactose positive enteric bacteria

| Source                         | Type III Sum of Squares | df  | Mean Square | F        | Sig. |
|--------------------------------|-------------------------|-----|-------------|----------|------|
| Corrected Model                | 320.852 <sup>a</sup>    | 35  | 9.167       | 990.057  | .000 |
| Intercept                      | 68.481                  | 1   | 68.481      | 7396.000 | .000 |
| Insect_spp                     | 23.444                  | 3   | 7.815       | 844.000  | .000 |
| Processing_method              | 221.352                 | 8   | 27.669      | 2988.250 | .000 |
| Insect_spp * Processing_method | 76.056                  | 24  | 3.169       | 342.250  | .000 |
| Error                          | .667                    | 72  | .009        |          |      |
| Total                          | 390.000                 | 108 |             |          |      |
| Corrected Total                | 321.519                 | 107 |             |          |      |

a. R Squared = .998 (Adjusted R Squared = .997)

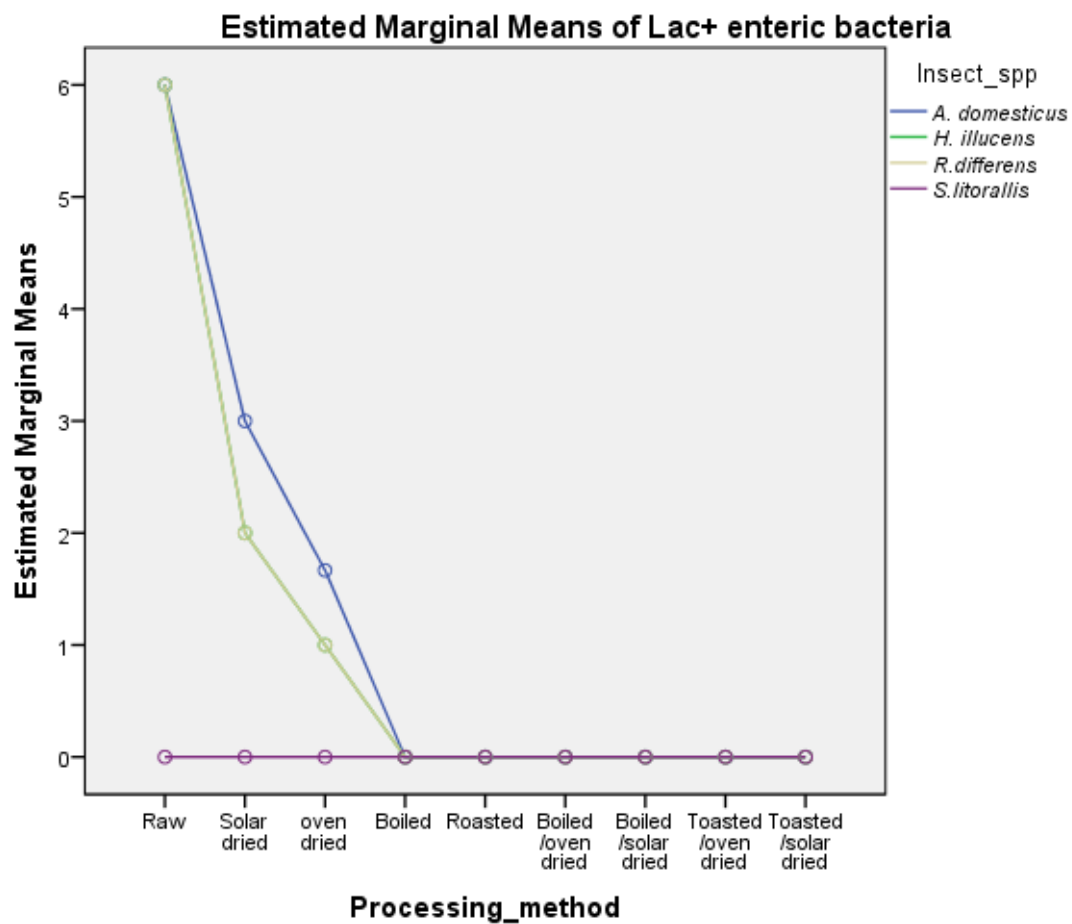

Figure S3.5: Interaction effect of insect species and processing technique on Lac+ enteric bacteria

Table S3.6: Effect of processing method and insect species on *S. aureus* (Log CFU/g)

**Tests of Between-Subjects Effects**

Dependent Variable: *S\_aureus*

| Source                         | Type III Sum of Squares | df  | Mean Square | F         | Sig. |
|--------------------------------|-------------------------|-----|-------------|-----------|------|
| Corrected Model                | 477.333 <sup>a</sup>    | 35  | 13.638      | 736.457   | .000 |
| Intercept                      | 1045.333                | 1   | 1045.333    | 56448.000 | .000 |
| Insect_spp                     | 29.852                  | 3   | 9.951       | 537.333   | .000 |
| Processing_method              | 439.333                 | 8   | 54.917      | 2965.500  | .000 |
| Insect_spp * Processing_method | 8.148                   | 24  | .340        | 18.333    | .000 |
| Error                          | 1.333                   | 72  | .019        |           |      |
| Total                          | 1524.000                | 108 |             |           |      |
| Corrected Total                | 478.667                 | 107 |             |           |      |

a. R Squared = .997 (Adjusted R Squared = .996)

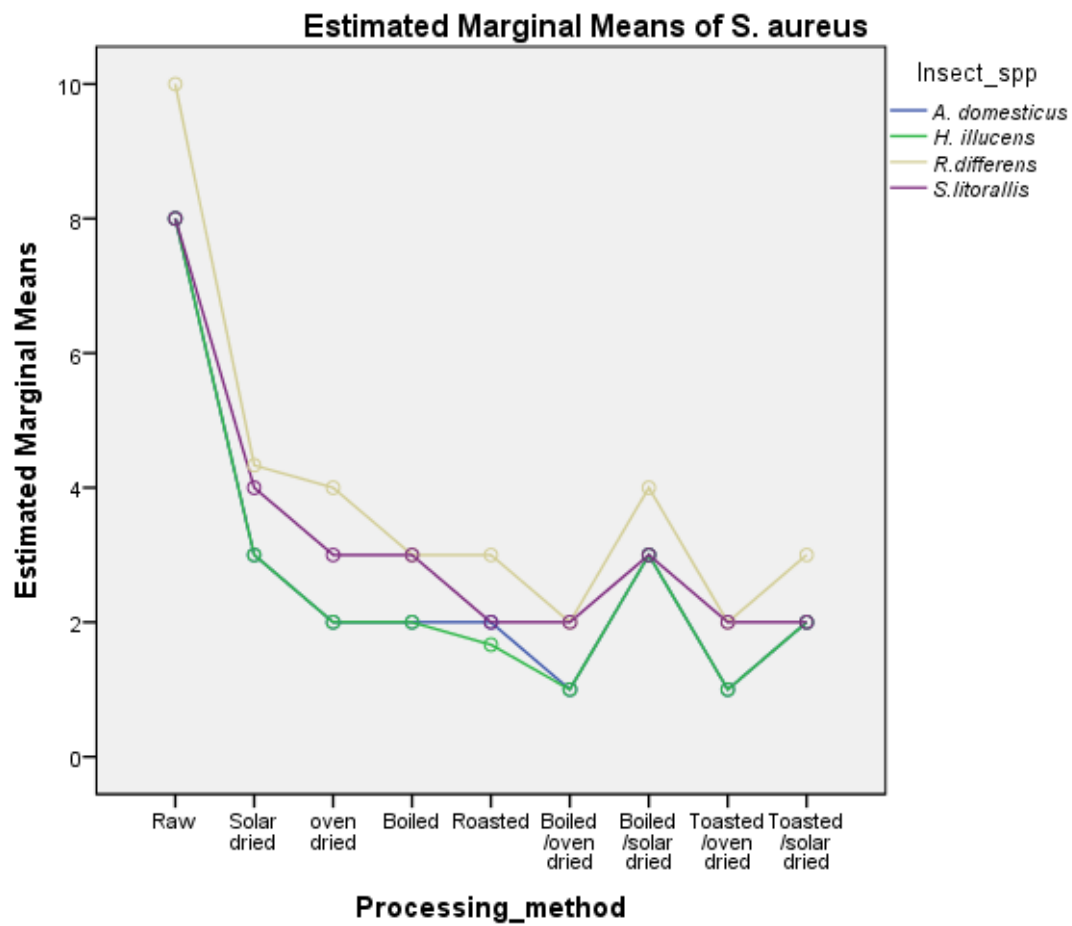

Figure S3.6: Interaction effect of insect species and processing technique on *Staphylococcus aureus*
